# Supplementary material
Source: ML conference proceedings conference paper supplement (https://proceedings.mlr.press/v164/priisalu22a.html)
Supplement: Supplementary file 2 [file priisalu22a-supp.zip]

Archive with 2 entries (1 files):
- Supplemenatry_Generating_Scenarios_with_Diverse_Pedestrian_Behaviors_for_AV_Testing/
- Supplemenatry_Generating_Scenarios_with_Diverse_Pedestrian_Behaviors_for_AV_Testing/Supplemenatry_Generating_Scenarios_with_Diverse_Pedestrian_Behaviors_for_AV_Testing.pdf
